# Supplementary material for: Genetic Associations of Interleukin-related Genes with Graves’ Ophthalmopathy: a Systematic Review and Meta-analysis
Source: PubMed Central journal article supplement (PMC4649612; doi:10.1038/srep16672), 2015-11-18
Supplement: srep16672-s1.pdf [file srep16672-s1.pdf]

## **Genetic Associations of Interleukin-related Genes with Graves' Ophthalmopathy: a Systematic Review and Meta-analysis**

Kah Hie Wong<sup>1\*</sup>, Shi Song Rong<sup>1\*</sup>, Kelvin K.L. Chong<sup>1,2</sup>, Alvin L. Young<sup>1,2</sup>, Chi Pui Pang<sup>1</sup>, Li Jia Chen<sup>1,2</sup>

<sup>1</sup> Department of Ophthalmology and Visual Sciences, The Chinese University of Hong Kong, Hong Kong, China;

<sup>2</sup> Department of Ophthalmology and Visual Sciences, Prince of Wales Hospital, Hong Kong, China.

\* contributed equally to the study

Number of supplementary information: 6 supplementary tables and 1 appendix

### **Correspondence:**

Dr Li Jia Chen

Department of Ophthalmology and Visual Sciences, The Chinese University of Hong Kong, Hong Kong Eye Hospital, 147K, Argyle Street, Kowloon, Hong Kong.

Tel: +852 39435810

Fax: +852 27159490

E-mail: [lijia\\_chen@cuhk.edu.hk](mailto:lijia_chen@cuhk.edu.hk)

**Supplementary Table 1. NOSPECS classification**

|   |                                      |
|---|--------------------------------------|
| N | No signs or symptoms                 |
| O | Only signs                           |
| S | Soft tissue symptoms and signs       |
| P | Proptosis                            |
| E | Extraocular muscle involvement       |
| C | Corneal involvement                  |
| S | Sight loss (optic nerve involvement) |

Supplementary Table 2. Subgroup analysis in Chinese population

| Gene        | Polymorphism | No. of cohorts | Genetic model  | Total allele or genotype counts |          | Fixed Effects Model |      | Random Effects Model |      | Heterogeneity |                    |
|-------------|--------------|----------------|----------------|---------------------------------|----------|---------------------|------|----------------------|------|---------------|--------------------|
|             |              |                |                | Cases                           | Controls | OR (95% CI)         | P    | OR (95% CI)          | P    | P for Q       | I <sup>2</sup> (%) |
| <i>IL1B</i> | rs16944      | 2              | C vs. T        | 780                             | 1,682    | 1.08 (0.91-1.29)    | 0.38 | 1.09 (0.91-1.29)     | 0.38 | 0.49          | 0.0                |
|             |              | 2              | CC vs. CT + TT | 390                             | 841      | 1.08 (0.83-1.41)    | 0.56 | 1.08 (0.83-1.41)     | 0.56 | 0.92          | 0.0                |
|             |              | 2              | CC + CT vs. TT | 390                             | 841      | 1.13 (0.81-1.57)    | 0.48 | 1.12 (0.66-1.89)     | 0.67 | 0.12          | 59.3               |
|             |              | 2              | CC vs. TT      | 188                             | 404      | 1.17 (0.80-1.70)    | 0.42 | 1.17 (0.77-1.78)     | 0.47 | 0.26          | 20.3               |
|             |              | 2              | CT vs. TT      | 265                             | 588      | 1.11 (0.78-1.57)    | 0.58 | 1.09 (0.61-1.97)     | 0.76 | 0.093         | 64.5               |
| <i>IL4</i>  | rs2070874    | 2              | T vs. C        | 566                             | 1,270    | 0.93 (0.72-1.19)    | 0.57 | 1.01 (0.64-1.59)     | 0.98 | 0.12          | 58.7               |
|             |              | 2              | TT vs. TC + CC | 283                             | 635      | 0.86 (0.64-1.16)    | 0.34 | 0.87 (0.63-1.19)     | 0.38 | 0.30          | 5.8                |
|             |              | 2              | TT + TC vs. CC | 283                             | 635      | 1.18 (0.52-2.68)    | 0.69 | 1.95 (0.26-14.34)    | 0.51 | 0.077         | 68.1               |
|             |              | 2              | TT vs. CC      | 184                             | 430      | 1.10 (0.48-2.52)    | 0.82 | 1.86 (0.24-14.77)    | 0.56 | 0.069         | 69.8               |
|             |              | 2              | TC vs. CC      | 107                             | 229      | 1.35 (0.58-3.14)    | 0.49 | 2.09 (0.32-13.67)    | 0.44 | 0.10          | 62.9               |

CI=Confidence interval; IL1B=Interleukin 1 Beta; IL4=Interleukin 4; No.=number; OR=Odds ratio.

Supplementary Table 3. Sensitivity analysis by excluding Lacka's study

| Gene        | Polymorphism | No. of cohorts | Ethnic group     | Genetic model  | Total allele or genotype counts |          | Fixed Effects Model |      | Random Effects Model |      | Heterogeneity |                    |
|-------------|--------------|----------------|------------------|----------------|---------------------------------|----------|---------------------|------|----------------------|------|---------------|--------------------|
|             |              |                |                  |                | Cases                           | Controls | OR (95% CI)         | P    | OR (95% CI)          | P    | P for Q       | I <sup>2</sup> (%) |
| <i>IL1B</i> | rs16944      | 3 <sup>a</sup> | Chinese, Iranian | C vs. T        | 880                             | 1,796    | 1.11 (0.94-1.31)    | 0.24 | 1.11 (0.94-1.31)     | 0.24 | 0.56          | 0.0                |
|             |              |                |                  | CC vs. CT + TT | 440                             | 898      | 1.10 (0.86-1.42)    | 0.45 | 1.10 (0.86-1.42)     | 0.45 | 0.90          | 0.0                |
|             |              |                |                  | CC + CT vs. TT | 440                             | 898      | 1.19 (0.86-1.64)    | 0.29 | 1.24 (0.76-2.04)     | 0.39 | 0.14          | 48.0               |
|             |              |                |                  | CC vs. TT      | 209                             | 430      | 1.24 (0.86-1.78)    | 0.24 | 1.26 (0.83-1.89)     | 0.28 | 0.28          | 16.1               |
|             |              |                |                  | CT vs. TT      | 298                             | 629      | 1.17 (0.83-1.63)    | 0.37 | 1.22 (0.71-2.08)     | 0.47 | 0.13          | 51.0               |
| <i>IL1B</i> | rs1143634    | 2 <sup>a</sup> | Chinese, Iranian | T vs. C        | 500                             | 652      | 1.11 (0.66-1.88)    | 0.69 | 1.11 (0.66-1.88)     | 0.69 | 0.59          | 0.0                |
|             |              |                |                  | TT vs. TC + CC | 250                             | 326      | 2.11 (0.43-10.38)   | 0.36 | 2.11 (0.43-10.38)    | 0.36 | 0.81          | 0.0                |
|             |              |                |                  | TT + TC vs. CC | 250                             | 326      | 1.16 (0.61-2.18)    | 0.66 | 1.16 (0.61-2.18)     | 0.66 | 0.96          | 0.0                |
|             |              |                |                  | TT vs. CC      | 31                              | 36       | 2.21 (0.43-11.35)   | 0.34 | 2.21 (0.43-11.35)    | 0.34 | 0.85          | 0.0                |
|             |              |                |                  | TC vs. CC      | 246                             | 324      | 1.09 (0.57-2.09)    | 0.79 | 1.09 (0.57-2.09)     | 0.79 | 0.86          | 0.0                |

CI=Confidence interval; IL1B=Interleukin 1 Beta; OR=Odds ratio; No.=number.

<sup>a</sup> Control subjects were defined as GD without GO; Lacka's study was excluded <sup>1</sup>.

## Reference

- 1 Lacka, K. *et al.* Interleukin-1beta gene (IL-1beta) polymorphisms (SNP -511 and SNP +3953) in thyroid-associated ophthalmopathy (TAO) among the Polish population. *Curr Eye Res* **34**, 215-220, (2009).

Supplementary Table 4. Quality assessments of included case-control studies using the Newcastle Ottawa Scale

| No. | Study (year)         | Selection |   |   |   | Comparability |      | Exposure |   |   | Total no. of stars |
|-----|----------------------|-----------|---|---|---|---------------|------|----------|---|---|--------------------|
|     |                      | 1         | 2 | 3 | 4 | 1(a)          | 1(b) | 1(a)     | 2 | 3 |                    |
| 1   | Cuddihy RM (1996)    | *         | * | - | * | *             | *    | *        | * | * | 8                  |
| 2   | Muhlberg T (1998)    | *         | * | - | * | *             | *    | *        | * | * | 8                  |
| 3   | Bednarczuk T (2003)  | *         | * | - | * | *             | *    | *        | * | * | 8                  |
| 4   | Bednarczuk T (2004)  | *         | * | - | * | *             | *    | *        | * | * | 8                  |
| 5   | Yang Y (2005)        | *         | - | - | * | *             | *    | *        | * | * | 7                  |
| 6   | Hiromatsu Y (2005)   | *         | * | - | * | *             | *    | *        | * | * | 8                  |
| 7   | Hiromatsu Y (2006)   | *         | * | - | * | *             | *    | *        | * | * | 8                  |
| 8   | Huber AK (2008)      | -         | * | - | * | *             | *    | *        | * | * | 7                  |
| 9   | Ban Y (2009)         | -         | * | - | * | *             | *    | *        | * | * | 7                  |
| 10  | Lacka K (2009)       | *         | * | - | * | *             | -    | *        | * | * | 7                  |
| 11  | Khalilzadeh O (2009) | *         | * | - | * | *             | *    | *        | * | * | 8                  |
| 12  | Anvari M (2010)      | *         | * | - | * | *             | *    | *        | * | * | 8                  |
| 13  | Liu N (2010)         | *         | * | * | * | *             | -    | *        | * | * | 8                  |
| 14  | Zhu W (2010)         | *         | * | - | * | *             | -    | *        | * | * | 7                  |
| 15  | Liu YH (2010)        | *         | * | - | * | *             | -    | *        | * | * | 7                  |
| 16  | Khalilzadeh O (2010) | *         | * | - | * | *             | *    | *        | * | * | 8                  |

"-" means no star was assigned.

**Supplementary Table 5. Searching strategies used in Ovid platform**

|    |                                                                                                                           |
|----|---------------------------------------------------------------------------------------------------------------------------|
| 1  | ((thyroid associated or thyroid-associated) and (orbitopathy or orbitopathies or ophthalmopathy or ophthalmopathies)).tw. |
| 2  | (endocrine and (orbitopathy or orbitopathies or ophthalmopathy or ophthalmopathies)).tw.                                  |
| 3  | ophthalmic Graves disease.tw.                                                                                             |
| 4  | (thyroid and (orbitopathy or orbitopathies or ophthalmopathy or ophthalmopathies)).tw.                                    |
| 5  | (Graves adj1 (orbitopathy or orbitopathies or ophthalmopathy or ophthalmopathies)).tw.                                    |
| 6  | (dysthyroid and (orbitopathy or orbitopathies or ophthalmopathy or ophthalmopathies)).tw.                                 |
| 7  | exp endocrine ophthalmopathy/                                                                                             |
| 8  | 1 or 2 or 3 or 4 or 5 or 6 or 7                                                                                           |
| 9  | exp Interleukins/                                                                                                         |
| 10 | (interleukin or interleukins).mp.                                                                                         |
| 11 | 9 or 10                                                                                                                   |
| 12 | 8 and 11                                                                                                                  |

Supplementary Table 6. Allele information of polymorphisms eligible for meta-analysis

| No. | Author (year)          | Sample size |          | Gene         | Polymorphism | Definition of allele |        | Allele count (A1/A2) |             |
|-----|------------------------|-------------|----------|--------------|--------------|----------------------|--------|----------------------|-------------|
|     |                        | Cases       | Controls |              |              | A1                   | A2     | Cases                | Controls    |
| 1   | Cuddihy, R. M. (1996)  | 98          | 28       | <i>IL1RA</i> | A2/non-A2*   | A2                   | Non-A2 | 47 / 149             | 9 / 47      |
| 2   | Muhlberg, T. (1998)    | 44          | 100      | <i>IL1RA</i> | A2/non-A2*   | A2                   | Non-A2 | 20 / 68              | 36 / 164    |
| 3   | Bednarczuk, T. (2003)  | 93          | 168      | <i>IL13</i>  | rs1800925    | T                    | C      | 61 / 125             | 99 / 237    |
|     |                        | 93          | 168      | <i>IL13</i>  | c.-2044G>A   | A                    | G      | 50 / 136             | 82 / 254    |
| 4   | Bednarczuk, T. (2004)  | 108         | 171      | <i>IL6</i>   | c.-174G>C    | C                    | G      | 95 / 121             | 155 / 187   |
| 5   | Hiromatsu, Y. (2005)   | 98          | 212      | <i>IL13</i>  | rs1800925    | C                    | T      | 170 / 26             | 351 / 73    |
|     |                        | 98          | 212      | <i>IL13</i>  | c.-2044G>A   | G                    | A      | 148 / 48             | 307 / 117   |
| 6   | Yang, Y. (2005)        | 92          | 72       | <i>IL13</i>  | rs1800925    | C                    | T      | 156 / 28             | 117 / 27    |
|     |                        | 98          | 89       | <i>IL4</i>   | rs2070874    | T                    | C      | 166 / 30             | 143 / 35    |
| 7   | Hiromatsu, Y. (2006)   | 103         | 226      | <i>IL12B</i> | c.-1188A>C   | A                    | C      | 95 / 111             | 221 / 231   |
| 8   | Huber, A. K. (2008)    | 103         | 111      | <i>IL23R</i> | rs10889677   | C                    | A      | 162 / 44             | 148 / 74    |
|     |                        | 103         | 111      | <i>IL23R</i> | rs11209026   | G                    | A      | 191 / 11             | 184 / 14    |
|     |                        | 103         | 111      | <i>IL23R</i> | rs2201841    | A                    | G      | 164 / 44             | 151 / 73    |
|     |                        | 103         | 111      | <i>IL23R</i> | rs7530511    | C                    | T      | 168 / 34             | 173 / 25    |
| 9   | Ban, Y. (2009)         | 100         | 190      | <i>IL23R</i> | rs10889677   | A                    | C      | 146 / 48             | 263 / 119   |
|     |                        | 100         | 190      | <i>IL23R</i> | rs2201841    | G                    | A      | 142 / 52             | 263 / 119   |
|     |                        | 100         | 190      | <i>IL23R</i> | rs7530511    | C                    | T      | 192 / 2              | 381 / 1     |
| 10  | Lacka, K. (2009)       | 75          | 42       | <i>IL1B</i>  | rs16944      | C                    | T      | 103 / 47             | 59 / 25     |
| 11  | Khalilzadeh, O. (2009) | 50          | 57       | <i>IL1A</i>  | rs1800587    | T                    | C      | 62 / 38              | 49 / 65     |
|     |                        | 50          | 57       | <i>IL1B</i>  | rs1143634    | T                    | C      | 32 / 68              | 31 / 79     |
|     |                        | 50          | 57       | <i>IL1B</i>  | rs16944      | C                    | T      | 63 / 37              | 63 / 51     |
| 12  | Anvari, M. (2010)      | 50          | 57       | <i>IL12B</i> | c.-1188A>C   | A                    | C      | 44 / 56              | 77 / 37     |
|     |                        | 50          | 57       | <i>IL6</i>   | c.-174C>G    | G                    | C      | 37 / 63              | 60 / 54     |
| 13  | Liu, N. (2010)         | 190         | 570      | <i>IL1A</i>  | rs1800587    | C                    | T      | 336 / 44             | 1,035 / 103 |

| No. | Author (year)          | Sample size |          | Gene        | Polymorphism | Definition of allele |    | Allele count (A1/A2) |           |
|-----|------------------------|-------------|----------|-------------|--------------|----------------------|----|----------------------|-----------|
|     |                        | Cases       | Controls |             |              | A1                   | A2 | Cases                | Controls  |
|     |                        | 190         | 570      | <i>IL1B</i> | rs16944      | C                    | T  | 223 / 157            | 632 / 508 |
| 14  | Zhu, W. (2010)         | 190         | 561      | <i>IL4</i>  | rs2070874    | T                    | C  | 285 / 85             | 874 / 218 |
| 15  | Liu, Y.H. (2010)       | 200         | 271      | <i>IL1B</i> | rs1143634    | T                    | C  | 5 / 395              | 8 / 534   |
|     |                        | 200         | 271      | <i>IL1B</i> | rs16944      | C                    | T  | 229 / 171            | 309 / 233 |
| 16  | Khalilzadeh, O. (2010) | 50          | 57       | <i>IL4</i>  | rs2070874    | C                    | T  | 72 / 28              | 80 / 34   |

\* A2=2 repeats of a 86-bp segment; non-A2=other number of repeats of a 86-bp segment



## **Appendix 1**

### **NEWCASTLE - OTTAWA QUALITY ASSESSMENT SCALE CASE CONTROL STUDIES**

(accessed via [http://www.ohri.ca/programs/clinical\\_epidemiology/oxford.asp](http://www.ohri.ca/programs/clinical_epidemiology/oxford.asp))

Note: A study can be awarded a maximum of one star for each numbered item within the Selection and Exposure categories. A maximum of two stars can be given for Comparability.

#### **Selection**

- 1) Is the case definition adequate?
  - a) yes, with independent validation
  - b) yes, e.g. record linkage or based on self reports
  - c) no description
- 2) Representativeness of the cases
  - a) consecutive or obviously representative series of cases
  - b) potential for selection biases or not stated
- 3) Selection of Controls
  - a) community controls
  - b) hospital controls
  - c) no description
- 4) Definition of Controls
  - a) no history of disease (endpoint)
  - b) no description of source

#### **Comparability**

- 1) Comparability of cases and controls on the basis of the design or analysis
  - a) study controls for \_\_\_\_\_ (Select the most important factor: ethnicity)
  - b) study controls for any additional factor (This criteria could be modified to indicate specific control for a second important factor.)

#### **Exposure**

- 1) Ascertainment of exposure (genotyping)
  - a) secure record (e.g. surgical records)
  - b) structured interview where blind to case/control status
  - c) interview not blinded to case/control status
  - d) written self report or medical record only
  - e) no description
- 2) Same method of ascertainment for cases and controls
  - a) yes

b) no

3) Non-Response rate (genotype call rate)

a) same rate for both groups

b) non respondents described

c) rate different and no designation
